# Supplementary material for: The Effects of Ozone on Atlantic Salmon Post-Smolt in Brackish Water—Establishing Welfare Indicators and Thresholds
Source: MDPI journal article supplement (doi:10.3390/ijms21145109), 2020-07-20
Supplement: s1 [file s1]

## Epidermis

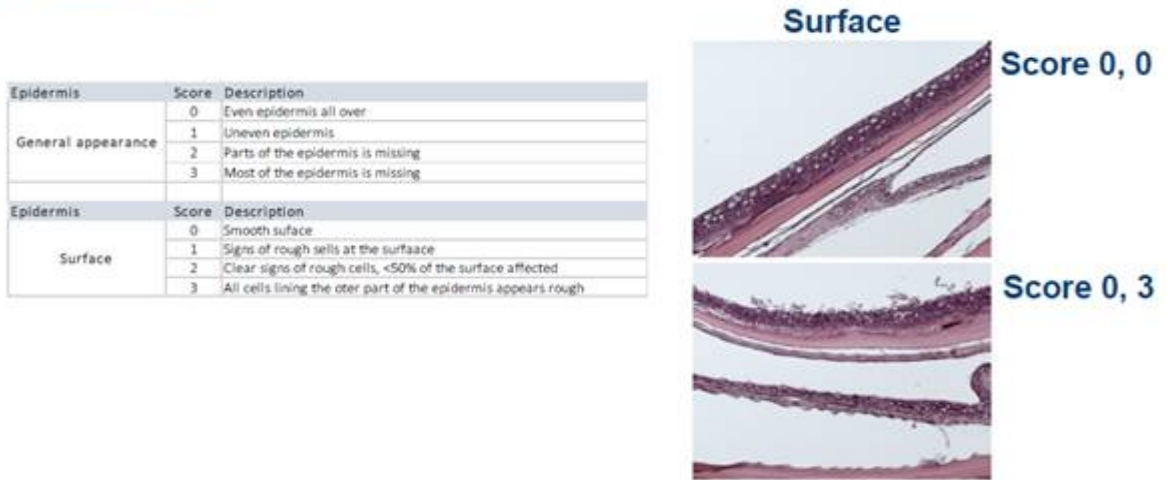

S1: Skin scoring table for general and surface appearance of the Epidermis after Sveen, 2018.

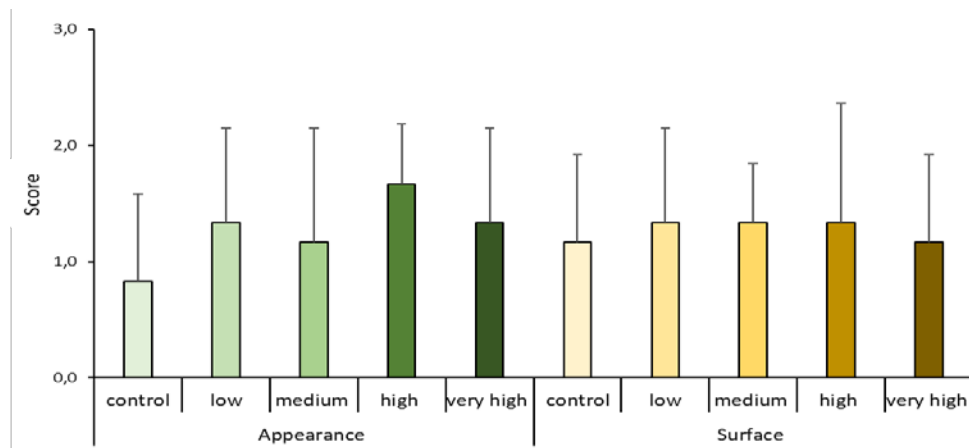

S2: Skin morphology scores of salmon exposed to different ozone treatments. Skin health status was assessed based on the general appearance and the surface appearance using a 3-point scale scoring system (0 indicates healthy skin with even and smooth cutaneous surface and epithelial structures are intact while 3 denotes poor skin health with epidermis missing and rough surface). Values are presented as mean  $\pm$  SD of 6 individual fish per treatment group. No statistical difference between groups.
